# Supplementary material
Source: HighWire-hosted journal article supplement (https://bmjopen.bmj.com/content/12/7/e062122)
Supplement: inline-supplementary-material-4 [file inline-supplementary-material-4.pdf]

## QUESTIONNAIRE B

### **1. Patient personal details**

Insurance number: .....

Name: .....

Date of birth: .....

Gender: Female/Male

Race: Caucasian / Black / Asian / Indian/ Other:

Date of questioning: .....

Institute:

Doctor:

Blood sample code:

Date of blood sampling:

### **1. Medical history**

**Alcohol consumption** YES / NO

If yes: daily /weekly/ monthly/ occasionally

**Smoking:** YES / NO

If yes: ..... pocket

..... years

If no: .. earlier? YES/NO

If yes: ..... pocket

..... years

**Diabetes mellitus (2):** since.....

**Hypertension:** YES since:.....

NO

### **2. Physical examination**

Height: ..... cm

Body weight:.....kg

BMI: .....kg/m<sup>2</sup>

Blood pressure:..... Hgmm

Heart rate:..... bpm

Blood sugar: ..... mmol/l

### 3. Treatment

#### Oral antidiabetic treatment

| NAME | Active substance | Dose (number only) | Unit (g/mg/IU) | Dosage (time/day) | Oral/subcutan | Since when? |
|------|------------------|--------------------|----------------|-------------------|---------------|-------------|
|      |                  |                    |                |                   |               |             |
|      |                  |                    |                |                   |               |             |
|      |                  |                    |                |                   |               |             |
|      |                  |                    |                |                   |               |             |
|      |                  |                    |                |                   |               |             |
|      |                  |                    |                |                   |               |             |
|      |                  |                    |                |                   |               |             |

#### Insulin treatment

| NAME | Active substance | Total daily dose | Since when? |
|------|------------------|------------------|-------------|
|      |                  |                  |             |
|      |                  |                  |             |
|      |                  |                  |             |

### 4. Blood sample - routine laboratory examination

|                                                         |  |
|---------------------------------------------------------|--|
| <b>Glycaemic controll</b>                               |  |
| Fasting plasma glucose (mmol/l)                         |  |
| Hemoglobin A1c (%)                                      |  |
| Plasma insulin (pmol/l??)- only in OAD treated patients |  |
| <b>Inflammatory markers</b>                             |  |
| CRP (mg/l)                                              |  |
| Erythrocyte sedimentation rate (mm/h)                   |  |
| <b>Blood</b>                                            |  |
| White blood cell count (G/l)                            |  |
| Neurophils (%)                                          |  |
| Red blood cell count (T/l)                              |  |
| Hemoglobin (g/l)                                        |  |
| Hematokrit (%)                                          |  |
| MCV (fl)                                                |  |
| Platelet count (G/l)                                    |  |
| <b>Ions</b>                                             |  |
| Sodium (mmol/l)                                         |  |
| Potassium (mmol/l)                                      |  |

|                                             |  |
|---------------------------------------------|--|
| <b>Renal function</b>                       |  |
| Urea nitrogen (mmol/l)                      |  |
| Creatinine (umol/l)                         |  |
| eGFR (ml/min/m <sup>2</sup> )               |  |
| <b>Liver functions</b>                      |  |
| Total bilirubin (umol/l)                    |  |
| Aspartate aminotransferase (ASAT/GOT – U/l) |  |
| Alanine aminotransferase (ALAT/GPT – U/l)   |  |
| Alkaline phosphatase (ALP – U/l)            |  |
| Lactate dehydrogenase (LDH – U/l)           |  |
| Gamma glutamyl transferase (GGT – U/l)      |  |
| Prothrombin (%)                             |  |
| INR                                         |  |
| Total protein (g/l)                         |  |
| Albumin (g/l)                               |  |
| <b>Lipids</b>                               |  |
| Total cholesterol (mmol/l)                  |  |
| Low-density lipoprotein (LDL – mmol/l)      |  |
| High-density lipoprotein (HDL – mmol/l)     |  |
| Triglyceride (mmol/l)                       |  |
| TSH (mU/l)                                  |  |
| <b>Iron status</b>                          |  |
| Iron (umol/l)                               |  |
| Transferrin (g/l)                           |  |
| Transferrin saturation (%)                  |  |
| Ferritin (ug/l)                             |  |
| Thrombocyte aggregation....????             |  |

### 5. Spot urine analysis

Albumin/creatinine ratio (ACR, mg/g): .....

| Fractional excretion of amino acids |  |
|-------------------------------------|--|
|                                     |  |
|                                     |  |
|                                     |  |
|                                     |  |
|                                     |  |
|                                     |  |
|                                     |  |
|                                     |  |
|                                     |  |

### 6. Oxidative stress markers – blood sample

|                       |  |
|-----------------------|--|
| Ortho-thyrozine level |  |
|-----------------------|--|

|                      |  |
|----------------------|--|
| Meta-thyrozine level |  |
| Para-thyrozine level |  |

7. **Heat shock proteins – blood sample**

Yes                      no

8. **Cardiovascular measurements**

| 24 h ambulatory blood pressure monitor                       |             |
|--------------------------------------------------------------|-------------|
| Mean systolic blood pressure (Hgmm)                          |             |
| Mean diastolic blood pressure (Hgmm)                         |             |
| Diurnal index (%)                                            |             |
| - Dipper (10-20%)                                            | YES      NO |
| - Non-dipper (<10%)                                          | YES      NO |
| - Extreme dipper (>20%)                                      | YES      NO |
| - Inversed diurnality                                        | YES      NO |
| Percent time elevation index (or hypertensive time index, %) |             |
| Pulse pressure (Hgmm)                                        |             |

**Arterial pulse wave velocity:** .....

**Overnight pulzoxymeter – apnoe-hypopnoe index (AHI):** .....

- AIH > 5:      YES              NO

9. **Examinations for neuropathy**

|                                                      |  | Neurometer  |                        |              |                          |             |                        |              |                          |
|------------------------------------------------------|--|-------------|------------------------|--------------|--------------------------|-------------|------------------------|--------------|--------------------------|
|                                                      |  | <u>Left</u> | <u>Nervus medianus</u> | <u>Right</u> | <u>Normal range (Hz)</u> | <u>Left</u> | <u>Nervus peroneus</u> | <u>Right</u> | <u>Normal range (Hz)</u> |
|                                                      |  |             | 2000 Hz                |              | <u>120-289</u>           |             | 2000 Hz                |              | <u>187-516</u>           |
| <b><u>Abnormal: 1</u></b><br><b><u>Normal: 0</u></b> |  |             |                        |              |                          |             |                        |              |                          |
|                                                      |  |             | 250 Hz                 |              | <u>22-180</u>            |             | 250 Hz                 |              | <u>44-190</u>            |
| <b><u>Abnormal: 1</u></b><br><b><u>Normal: 0</u></b> |  |             |                        |              |                          |             |                        |              |                          |

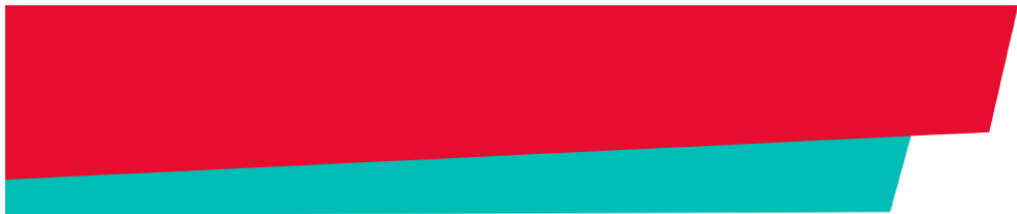

|                    |  |      |  |               |  |  |      |  |               |
|--------------------|--|------|--|---------------|--|--|------|--|---------------|
|                    |  | 5 Hz |  | <b>16-100</b> |  |  | 5 Hz |  | <b>18-170</b> |
| <b>Abnormal: 1</b> |  |      |  |               |  |  |      |  |               |
| <b>Normal: 0</b>   |  |      |  |               |  |  |      |  |               |

| 128-Hz tuning fork            |                      |                     |
|-------------------------------|----------------------|---------------------|
|                               | <b>Right radius:</b> | <b>Left radius:</b> |
| <b>Abnormal: 1, Normal: 0</b> |                      |                     |
|                               | <b>Right hallux:</b> | <b>Left hallux:</b> |
| <b>Abnormal: 1, Normal: 0</b> |                      |                     |

| <u>Symptoms of neuropathy</u>           |              |                                        |
|-----------------------------------------|--------------|----------------------------------------|
|                                         | <b>Score</b> | <b>Abnormal: 1</b><br><b>Normal: 0</b> |
| <b>DN4 Questionnaire</b>                |              |                                        |
| <b>Neuropathy Total Symptom Score-6</b> |              |                                        |

**Neurotest:** PINK MIXED BLUE  
0 1 1

**10. Adverse events: YES/NO**

|                                              | During the intervention | Immediately after the intervention (< 10 min) | Within 24 hours |
|----------------------------------------------|-------------------------|-----------------------------------------------|-----------------|
| Severe blood pressure decrease (hypotension) |                         |                                               |                 |
| Dizziness                                    |                         |                                               |                 |
| Syncope                                      |                         |                                               |                 |

Hypotension:..... Hgmm ----- Heart rate: ...../min

Dizziness (last): .....min

Syncope (last):.....min
